# Supplementary material for: Effect of Microbial Interactions on Performance of Community Metabolic Modeling Algorithms: Flux Balance analysis (FBA), Community FBA (cFBA) and SteadyCom
Source: Research Square preprint supplement (doi:10.21203/rs.3.rs-4226944/v1), 2024-04-12
Supplement: Supplementary file 1 [file 0939fe85d8772e6a2fcd26da.docx]

**Article title: Effect of Microbial Interactions on Performance of Community Metabolic Modeling Algorithms: Flux Balance analysis (FBA), Community FBA (cFBA) and SteadyCom**

**Bioprocess and Biosystems Engineering**

**Maryam Afarin; Fereshteh naeimpoor***

Biotechnology Research Laboratory, School of Chemical, Petroleum and Gas Engineering, Iran University of Science and Technology, Tehran, Iran

*Corresponding author; Email address: [fnaeim@iust.ac.ir](mailto:fnaeim@iust.ac.ir)

Table S1. Results obtained by FBA, cFBA and SteadyCom algorithms for commensal-competitive community

| **Community** | | | |  | **Exchange fluxes (mmol/h)** | | | | | | | | | | |
| --- | --- | --- | --- | --- | --- | --- | --- | --- | --- | --- | --- | --- | --- | --- | --- |
| **Run**  **code** | **μ**  **(1/h)** | **xm1*** | |  | **C from m1** | |  | **C to m2** | |  | **F** | |  | **G** | |
| **SC** | **cFBA** |  | **SC** | **cFBA, FBA** |  | **SC** | **cFBA, FBA** |  | **SC** | **cFBA, FBA** |  | **SC** | **cFBA, FBA** |
| T4-1 | 1 | 1 | 0.5-1 |  | 1 | 0.5-1, 0.5 |  | 0 | 0.5-0, 0.5 |  | 1 | 0.5-1, 0.5 |  | 0 | 0.5-0, 0.5 |
| T4-2 | 2 | 1 | |  | 1 | |  | 0 | |  | 2 | |  | 0 | |
| T4-3 | 1.5 | 0.33 | |  | 0.5 | |  | 0.5 | |  | 0.5 | |  | 1 | |
| *xm1refers to mass fraction of m1 in SteadyCom and cFBA | | | | | | | | | | | | | | | |

Table S2. Results obtained by FBA, cFBA and SteadyCom algorithms for mutualistic-competitive community

| **Community** | | | |  | **Fluxes (mmol/h)** | | | | | | | | | | | | | | |
| --- | --- | --- | --- | --- | --- | --- | --- | --- | --- | --- | --- | --- | --- | --- | --- | --- | --- | --- | --- |
| **Run code** | **µ(1/h)** | **xm1*** | |  | **Exchange** | | | | | | |  | **Biomass formation** | | | | | | |
| **cFBA** | **SC**** |  | **C to m2** | | |  | **D to m1** | | |  | **F** | | |  | **G** | | |
|  | **cFBA** | **SC** | **FBA** |  | **cFBA** | **SC** | **FBA** |  | **cFBA** | **SC** | **FBA** |  | **cFBA** | **SC** | **FBA** |
| T5-1 | 0.5 | 0.0005-0.9995 | 0.9995 |  | 0.49975-0.00025 | 0.00025 | 0 |  | 0.00025-0.49975 | 0.49975 | 0.5 |  | 0.00025-0.49975 | 0.49975 | 0.5 |  | 0.49975-0.00025 | 0.00025 | 0 |
| T5-2 | FBA=1,  cFBA & SC=0.9995 | 0.9995 | |  | 0.0005 | | 0 |  | 0.4995 | | 0.5 |  | 0.999 | | 1 |  | 0.0005 | | 0 |
| T5-3 | FBA=1,  cFBA & SC=0.9995 | 0.0005 | |  | 0.4995 | | 0.5 |  | 0.0005 | | 0 |  | 0.0005 | | 0 |  | 0.999 | | 1 |
| *xm1refers to mass fraction of m1 in SteadyCom and cFBA; **SC: SteadyCom | | | | | | | | | | | | | | | | | | | |
