# Supplementary material for: Effect of Microbial Interactions on Performance of Community Metabolic Modeling Algorithms: Flux Balance analysis (FBA), Community FBA (cFBA) and SteadyCom
Source: Research Square preprint supplement (doi:10.21203/rs.3.rs-4226944/v1), 2024-04-12
Supplement: Supplementary file 2 [file 69e6fb8f461fcb759289e624.docx]

**Article title: Effect of Microbial Interactions on Performance of Community Metabolic Modeling Algorithms: Flux Balance analysis (FBA), Community FBA (cFBA) and SteadyCom**

**Bioprocess and Biosystems Engineering**

**Maryam Afarin; Fereshteh naeimpoor***

Biotechnology Research Laboratory, School of Chemical, Petroleum and Gas Engineering, Iran University of Science and Technology, Tehran, Iran

*Corresponding author; Email address: [fnaeim@iust.ac.ir](mailto:fnaeim@iust.ac.ir)

**Flux distributions of runs T1-1 to T5-3 for run cFBA, FBA and SteadyCom algorithms and cFBA plots for run all runs**


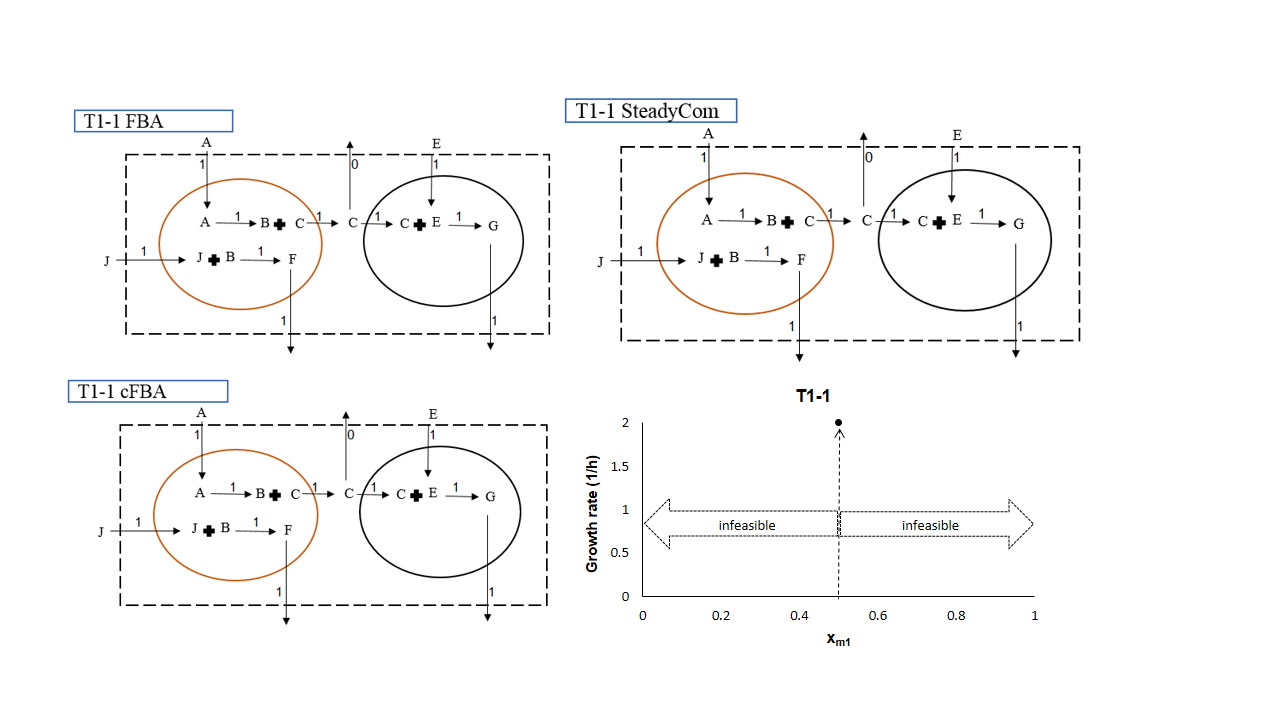


**Fig. S1** Flux distributions obtained by the three algorithms and cFBA plot for run T1-1


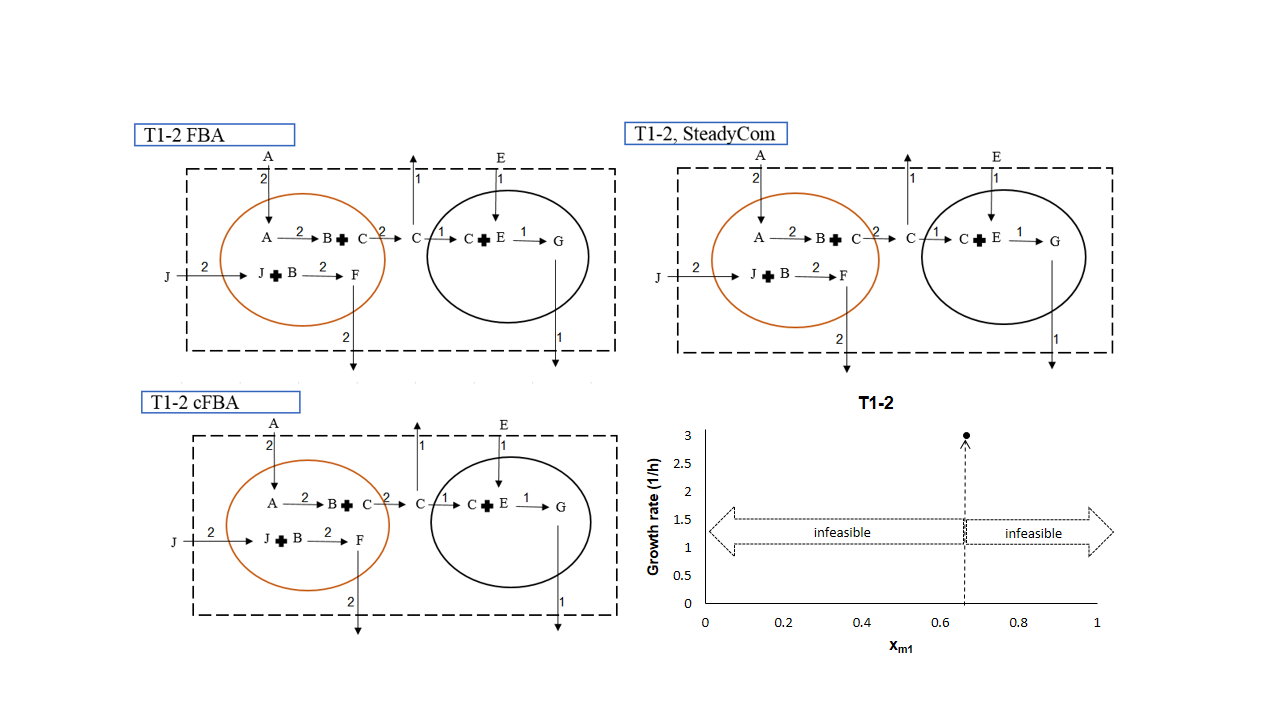


**Fig. S2** Flux distributions obtained by the three algorithms and cFBA plot for run T1-2


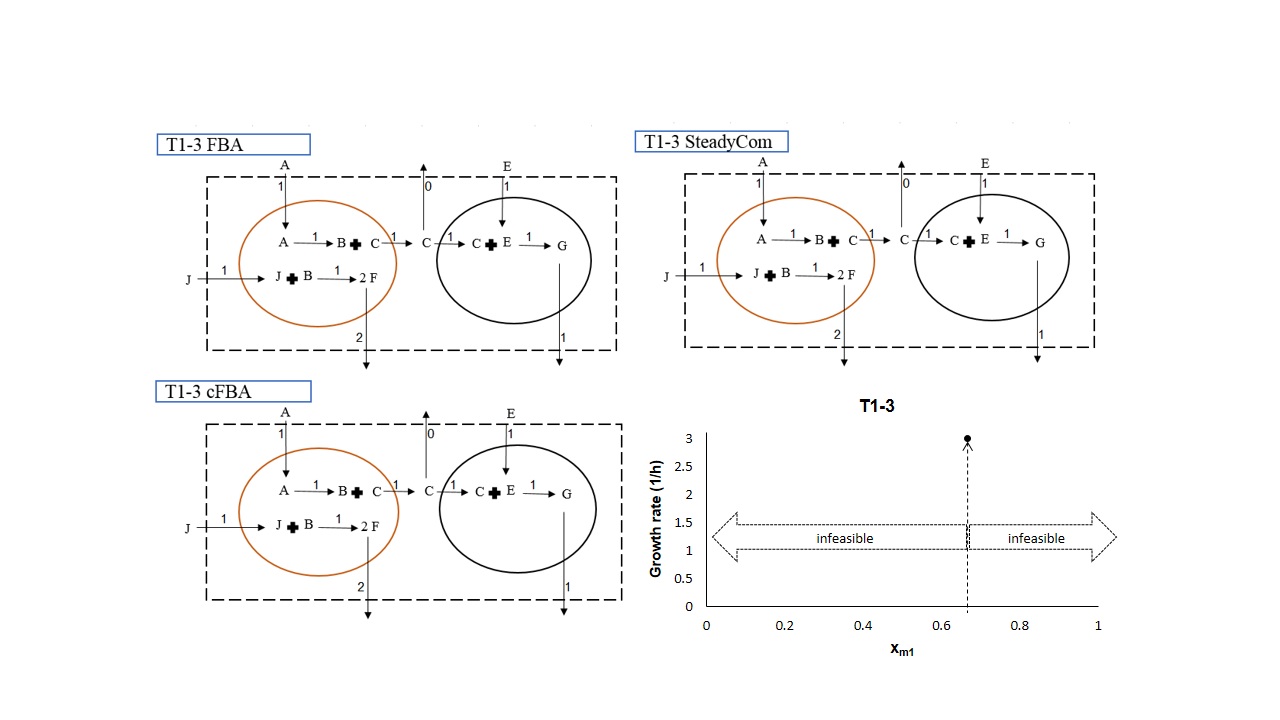


**Fig. S3** Flux distributions obtained by the three algorithms and cFBA plot for run T1-3


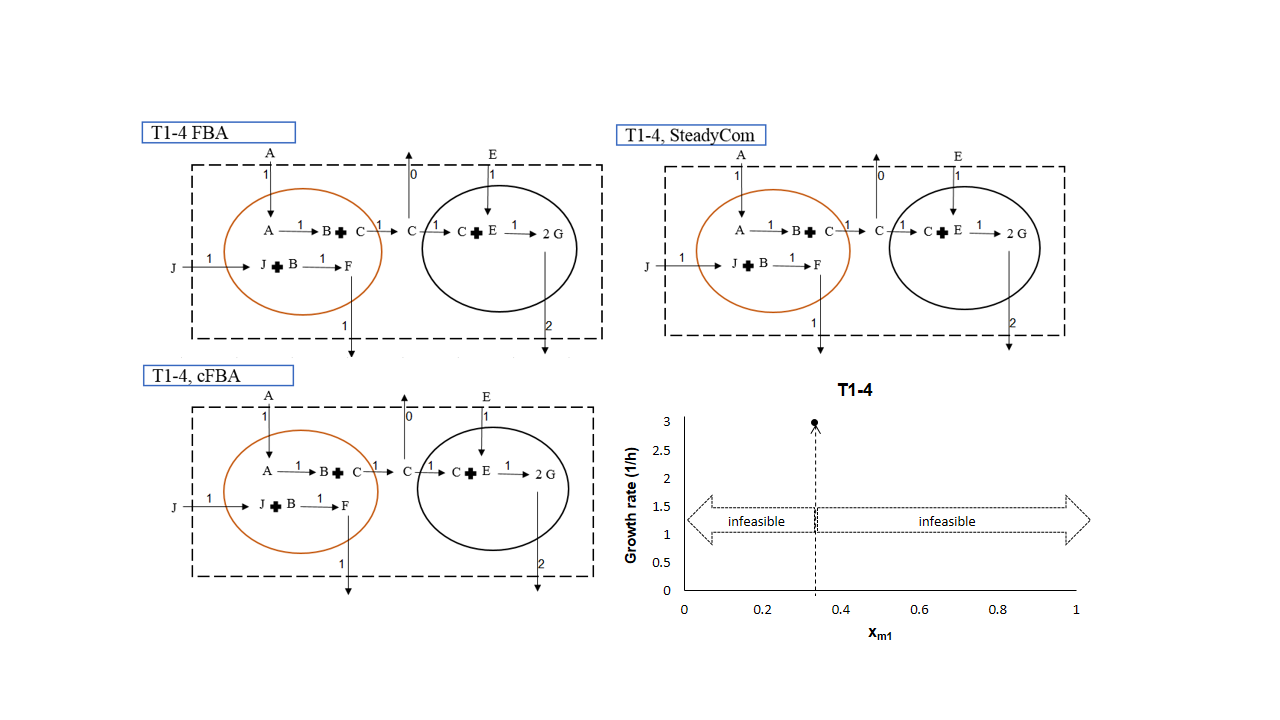


**Fig. S4** Flux distributions obtained by the three algorithms and cFBA plot for run T1-4


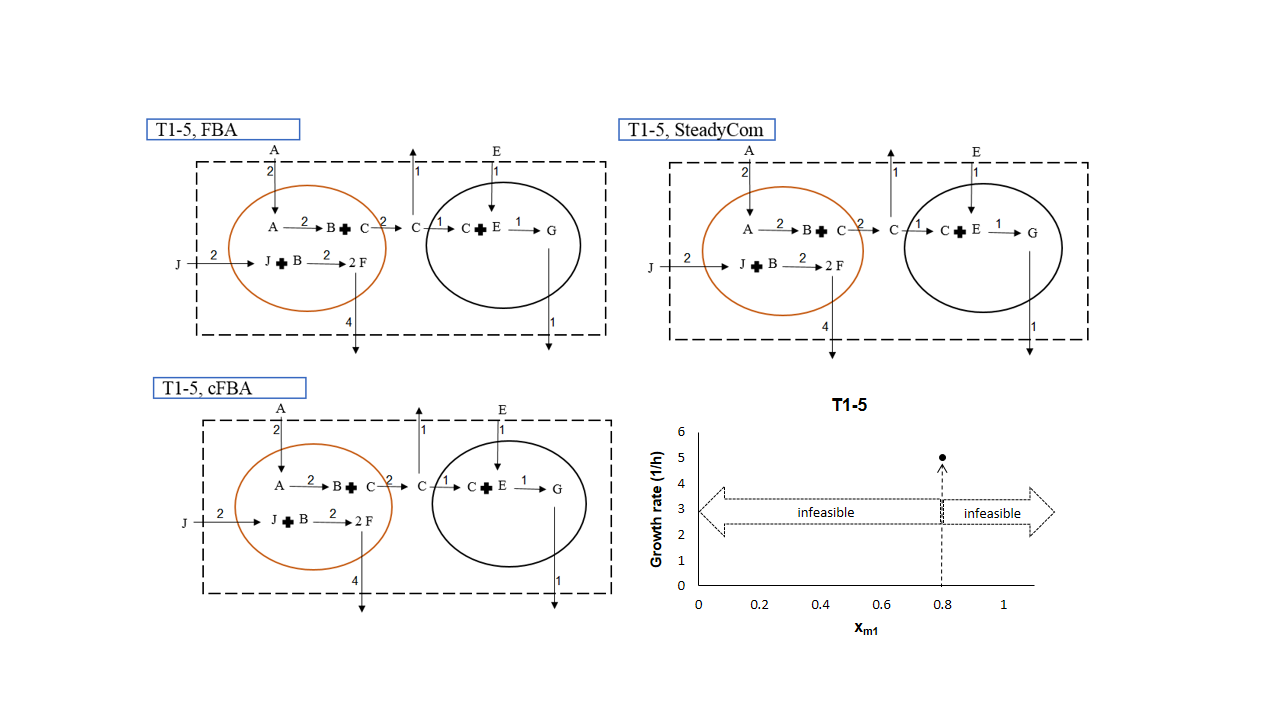


**Fig. S5** Flux distributions obtained by the three algorithms and cFBA plot for run T1-5


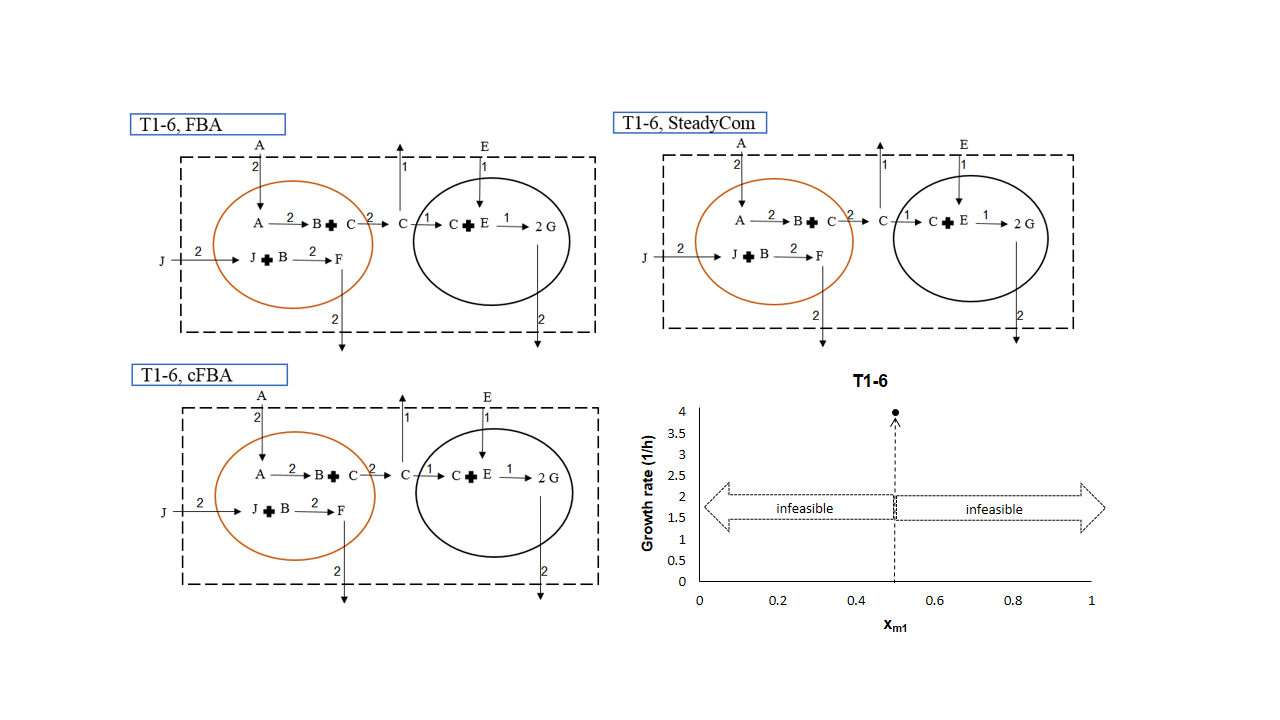


**Fig. S6** Flux distributions obtained by the three algorithms and cFBA plot for run T1-6


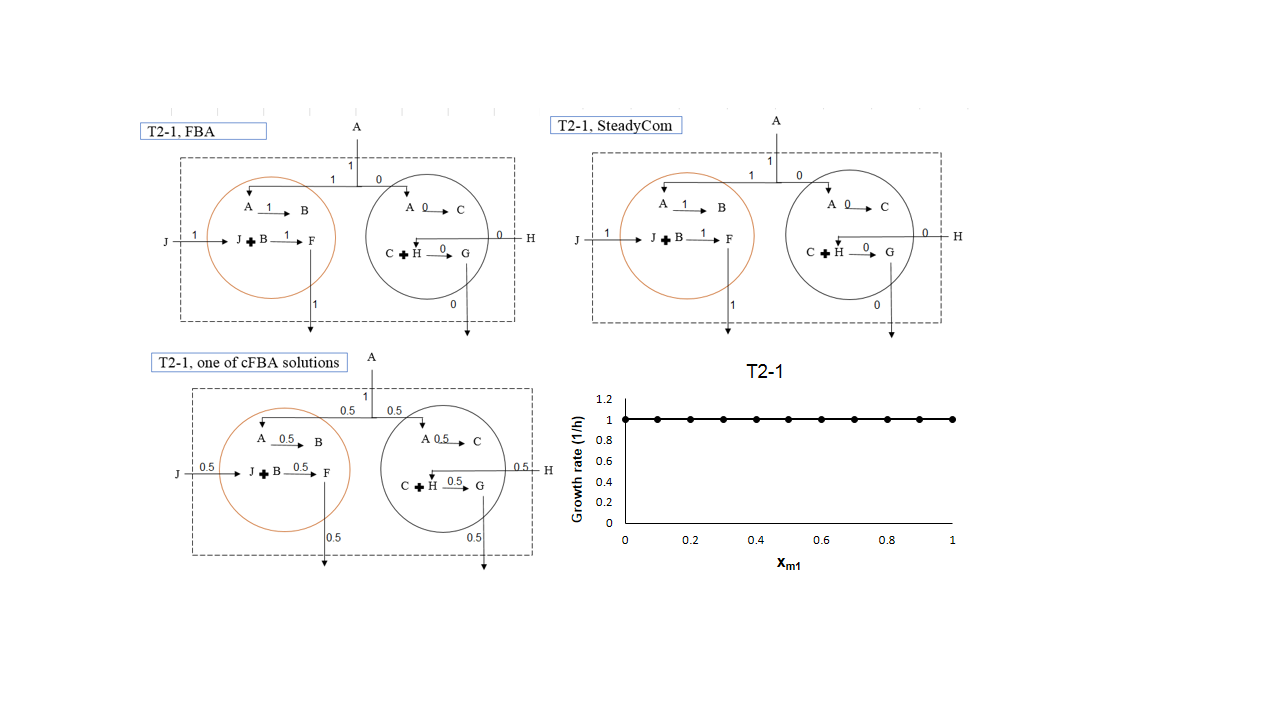


**Fig. S7** Flux distributions obtained by the three algorithms and cFBA plot for run T2-1


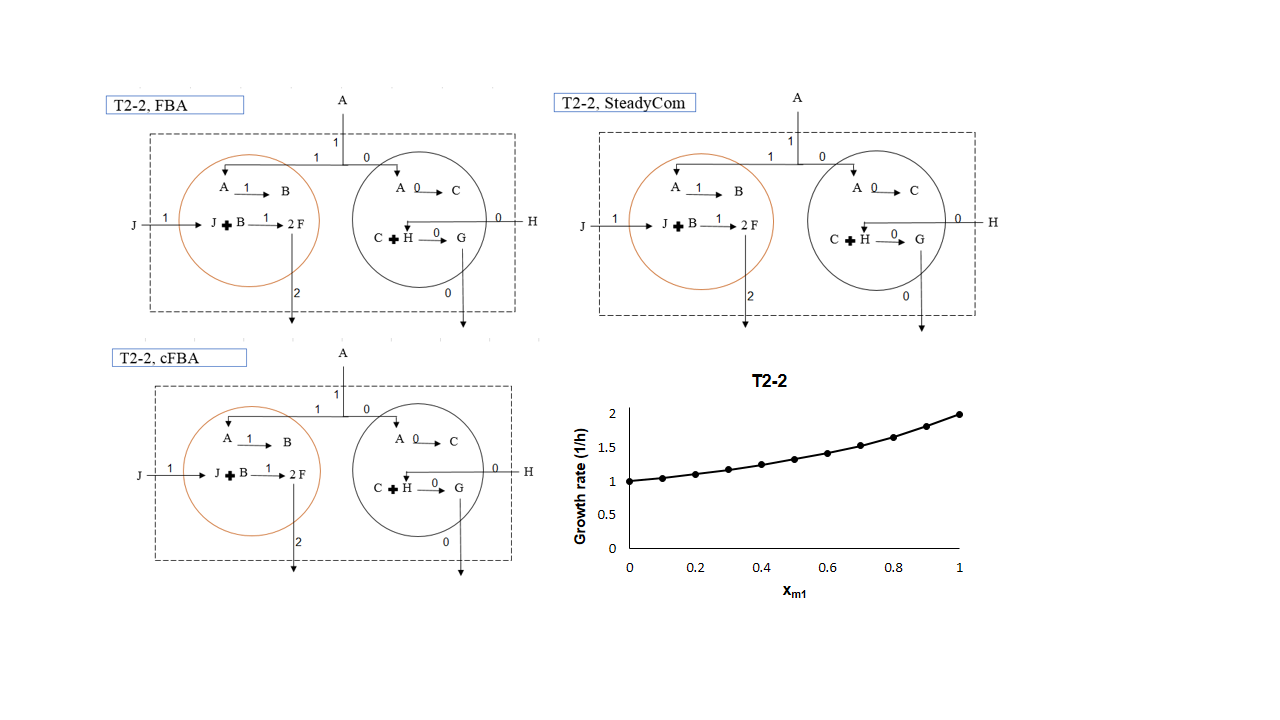


**Fig. S8** Flux distributions obtained by the three algorithms and cFBA plot for run T2-2


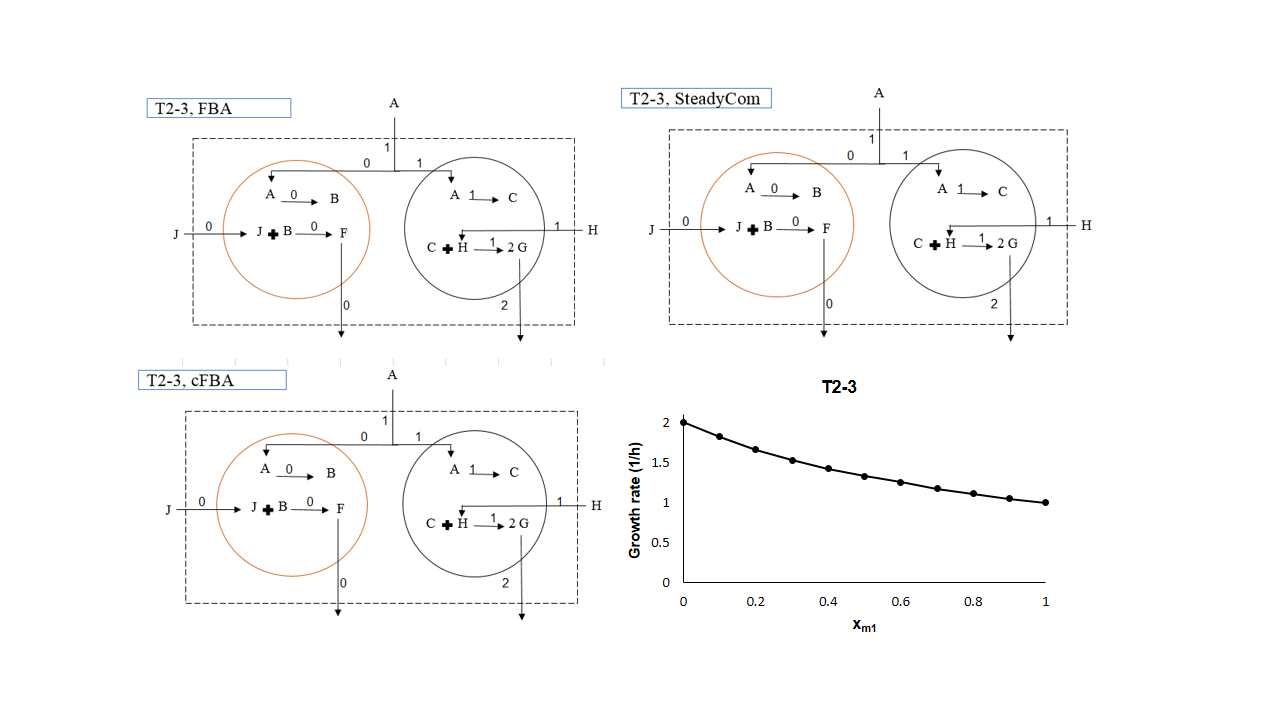


**Fig. S9** Flux distributions obtained by the three algorithms and cFBA plot for run T2-3


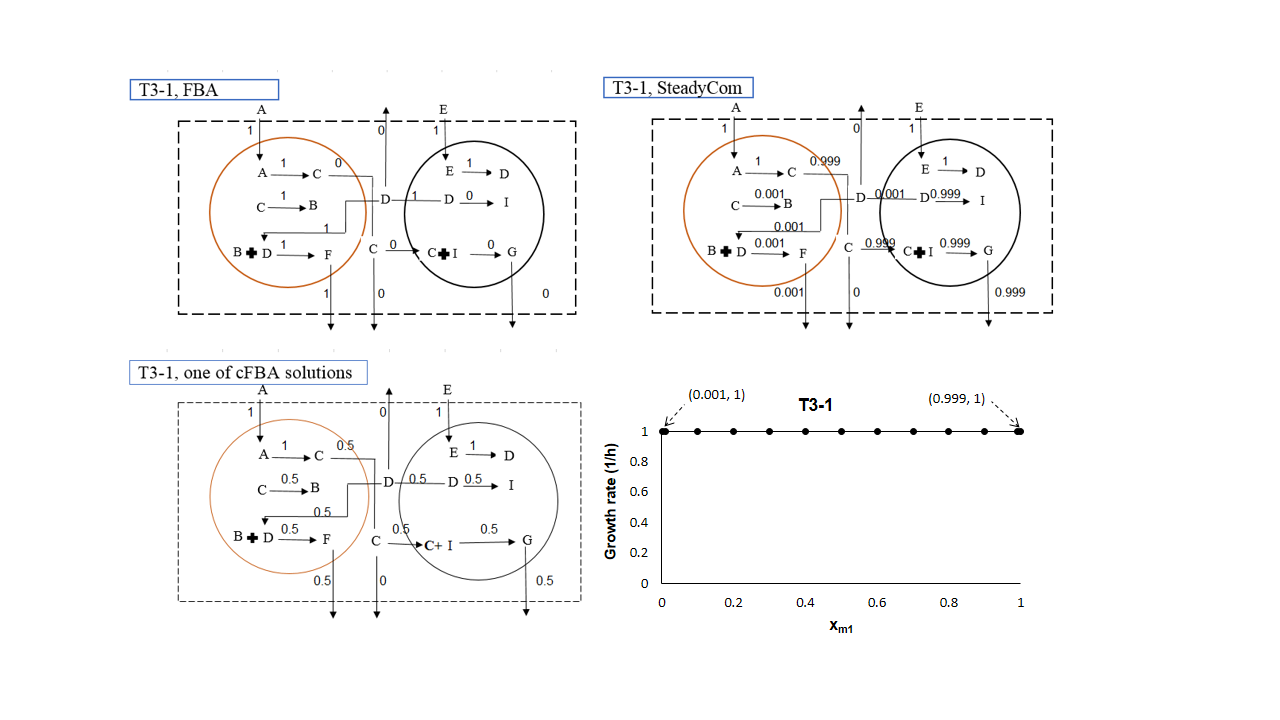


**Fig. S10** Flux distributions obtained by the three algorithms and cFBA plot for run T3-1


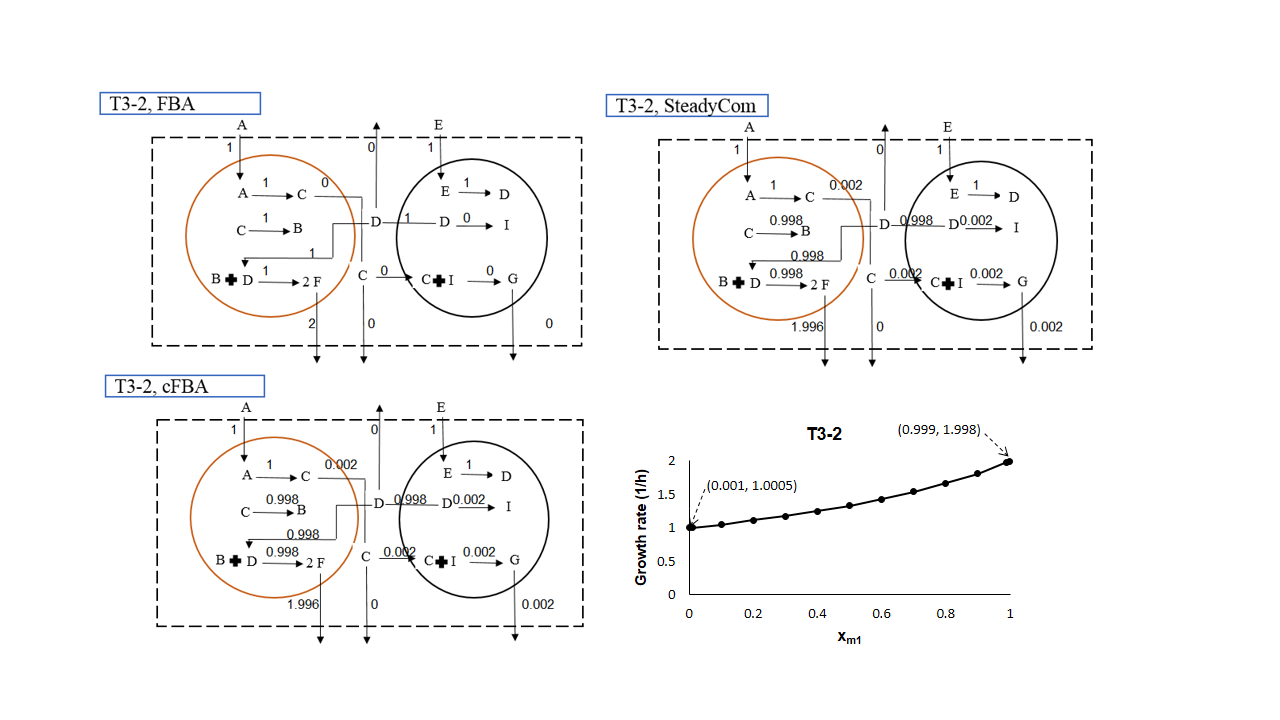


**Fig. S11** Flux distributions obtained by the three algorithms and cFBA plot for run T3-2


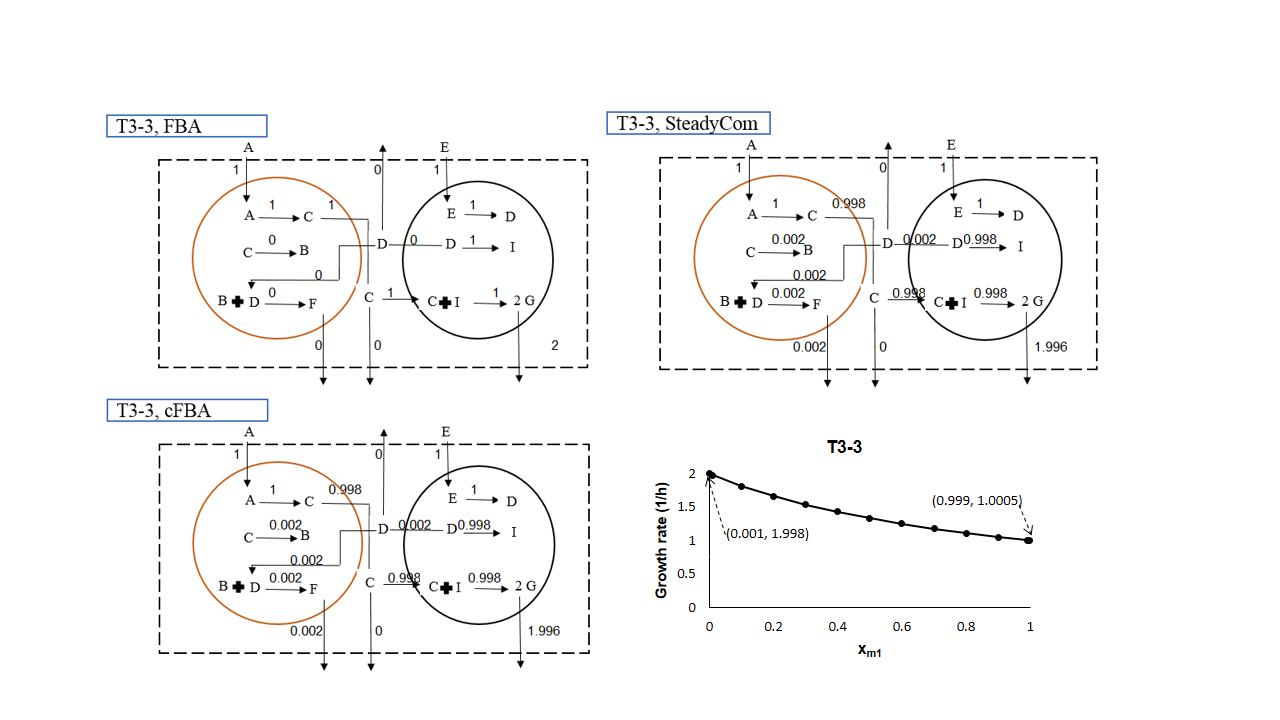


**Fig. S12** Flux distributions obtained by the three algorithms and cFBA plot for run T3-3


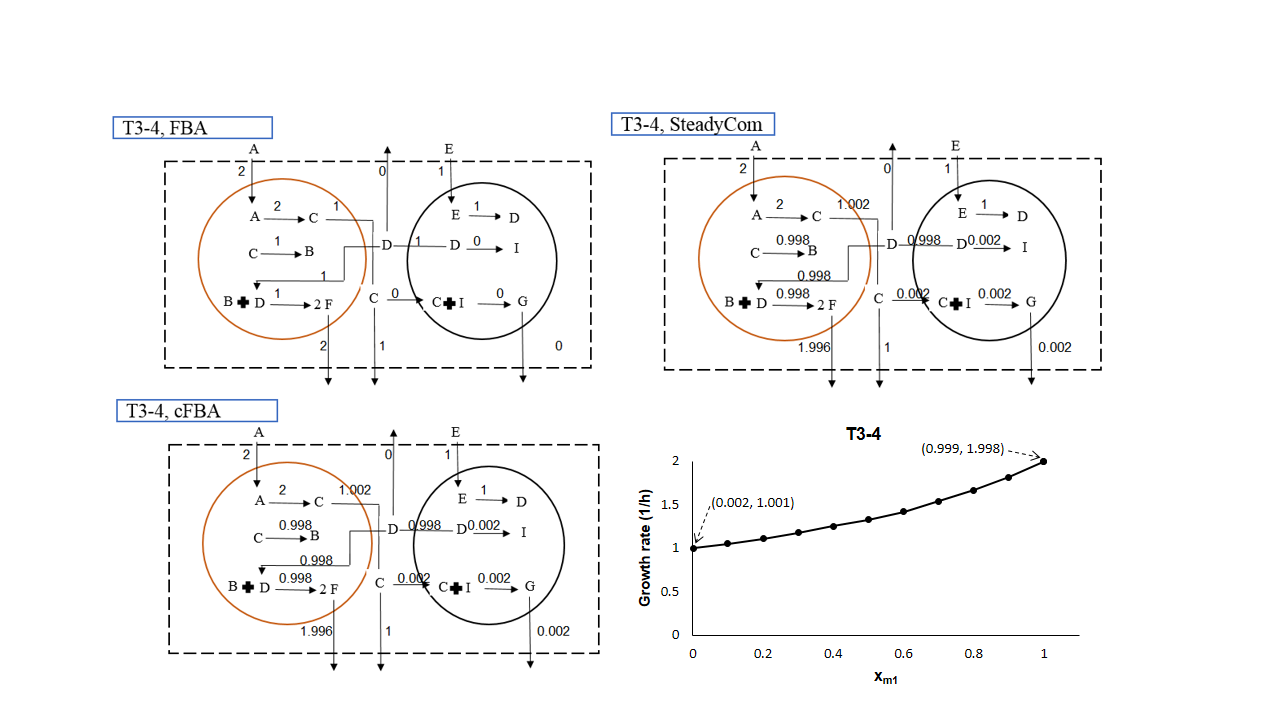


**Fig. S13** Flux distributions obtained by the three algorithms and cFBA plot for run T3-4


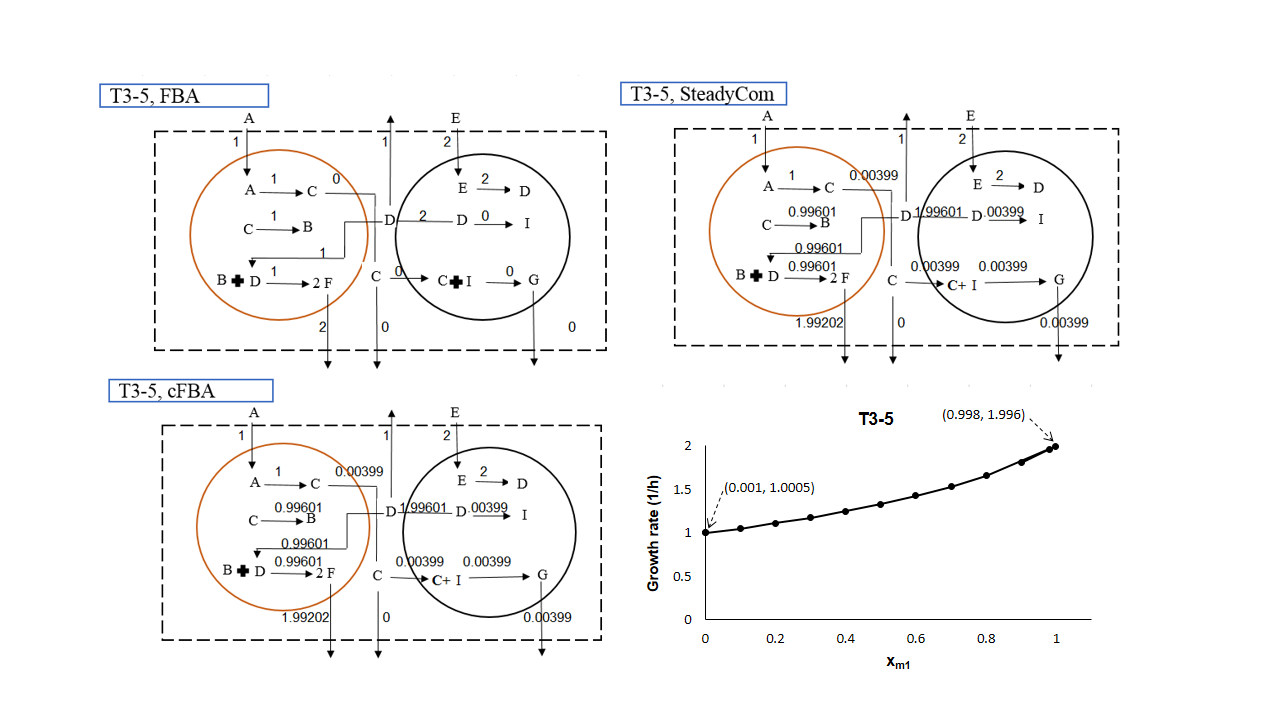


**Fig. S14** Flux distributions obtained by the three algorithms and cFBA plot for run T3-5


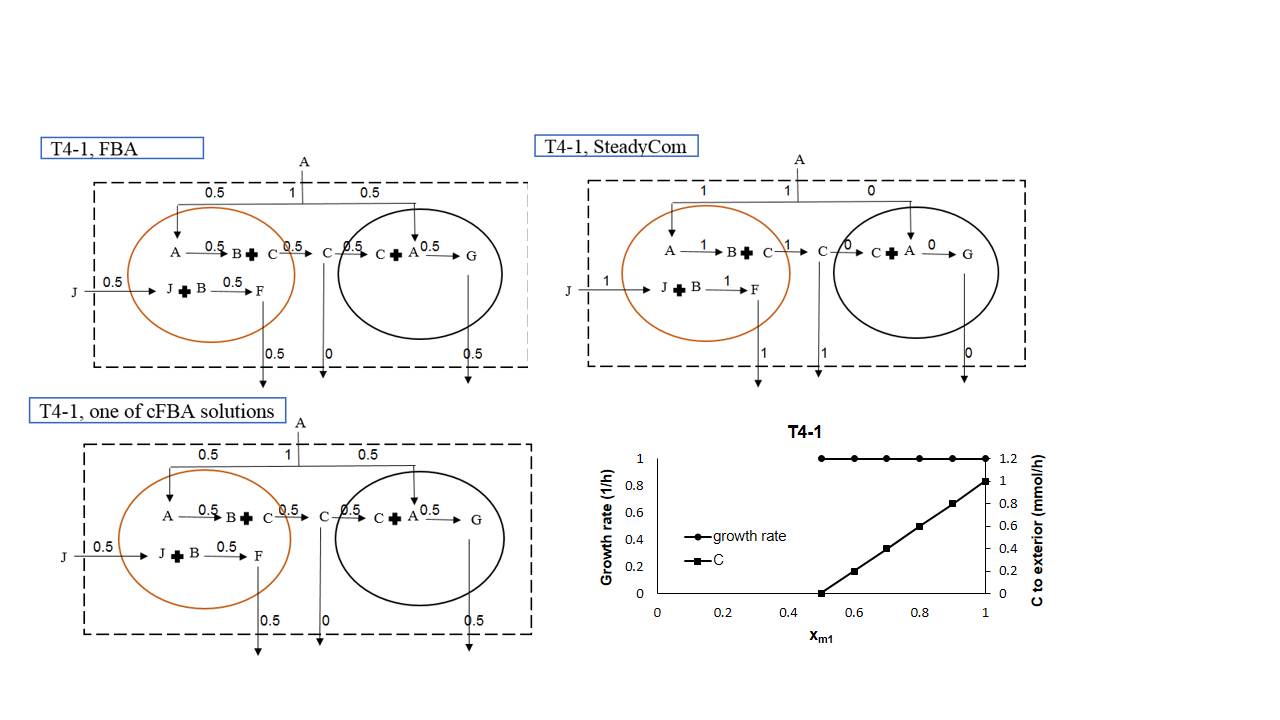


**Fig. S15** Flux distributions obtained by the three algorithms and cFBA plot for run T4-1


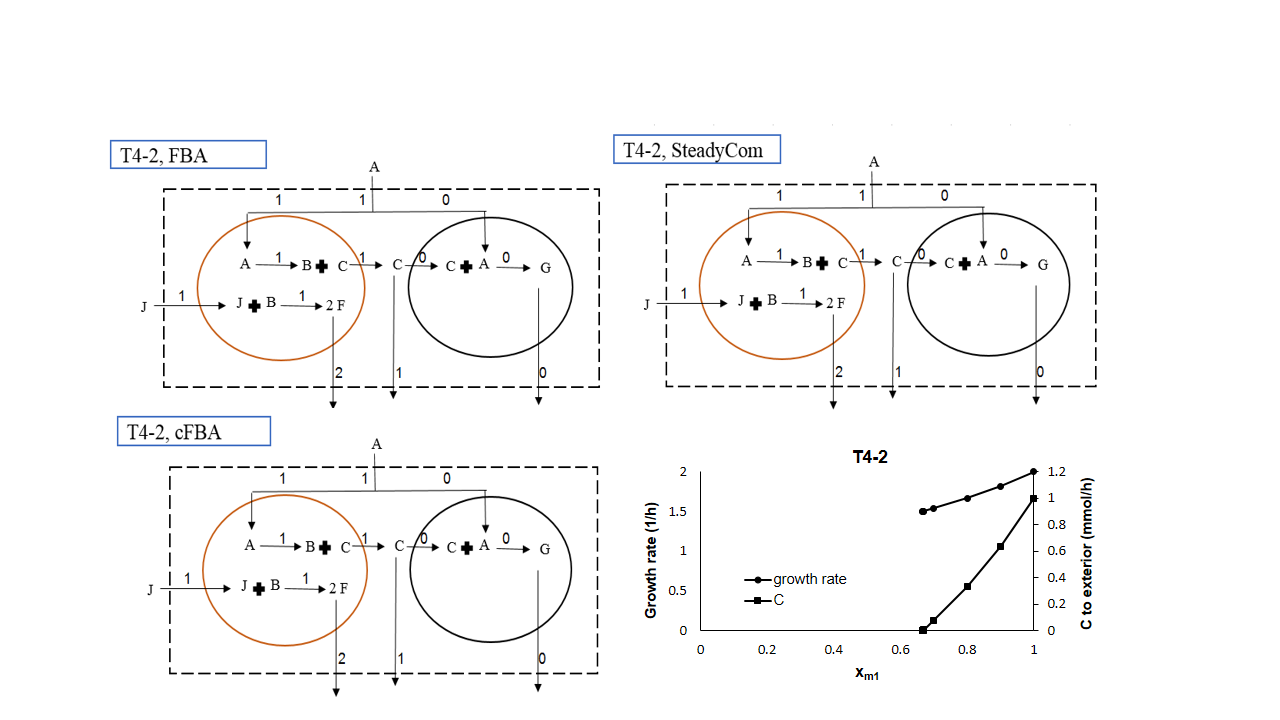


**Fig. S16** Flux distributions obtained by the three algorithms and cFBA plot for run T4-2


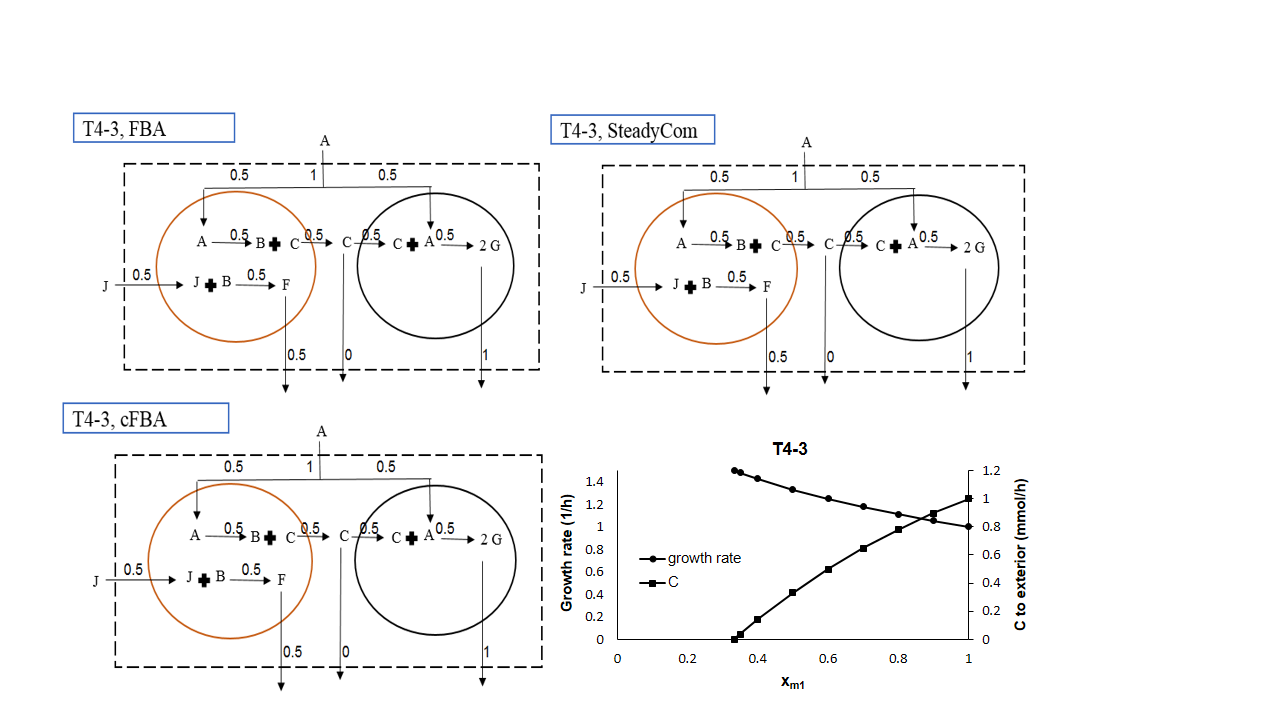


**Fig. S17** Flux distributions obtained by the three algorithms and cFBA plot for run T4-3


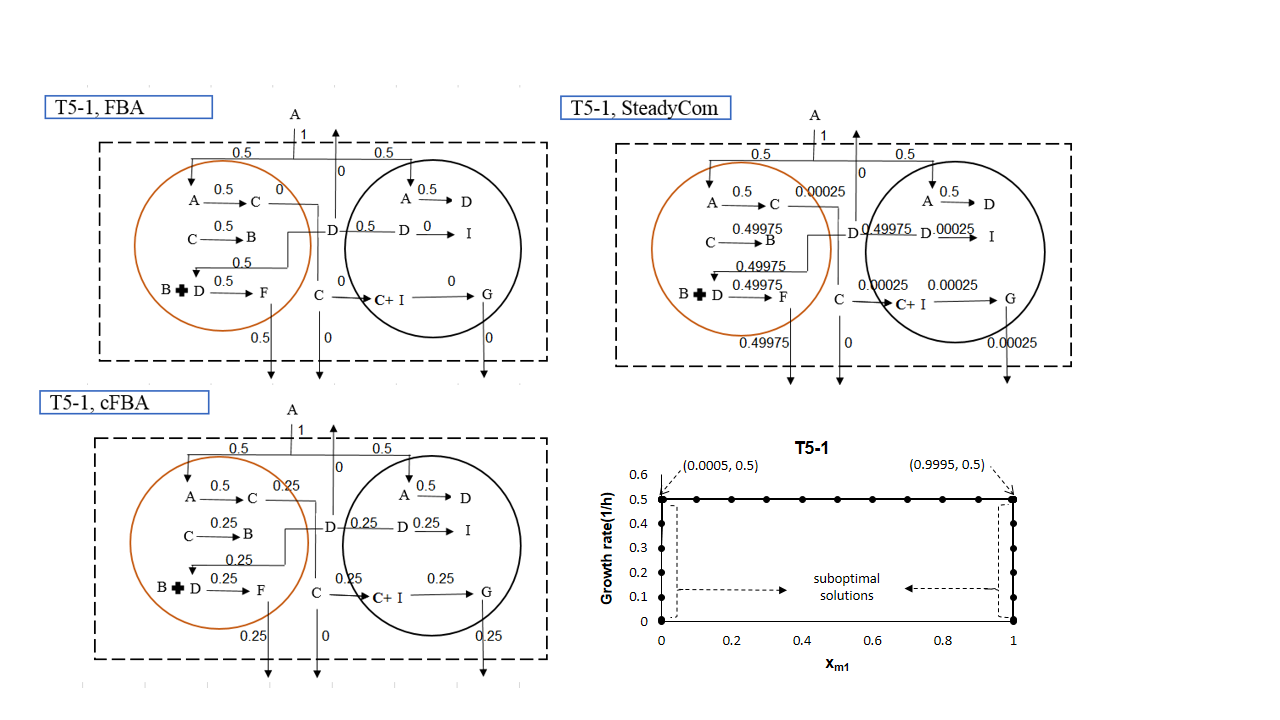


**Fig. S18** Flux distributions obtained by the three algorithms and cFBA plot for run T5-1


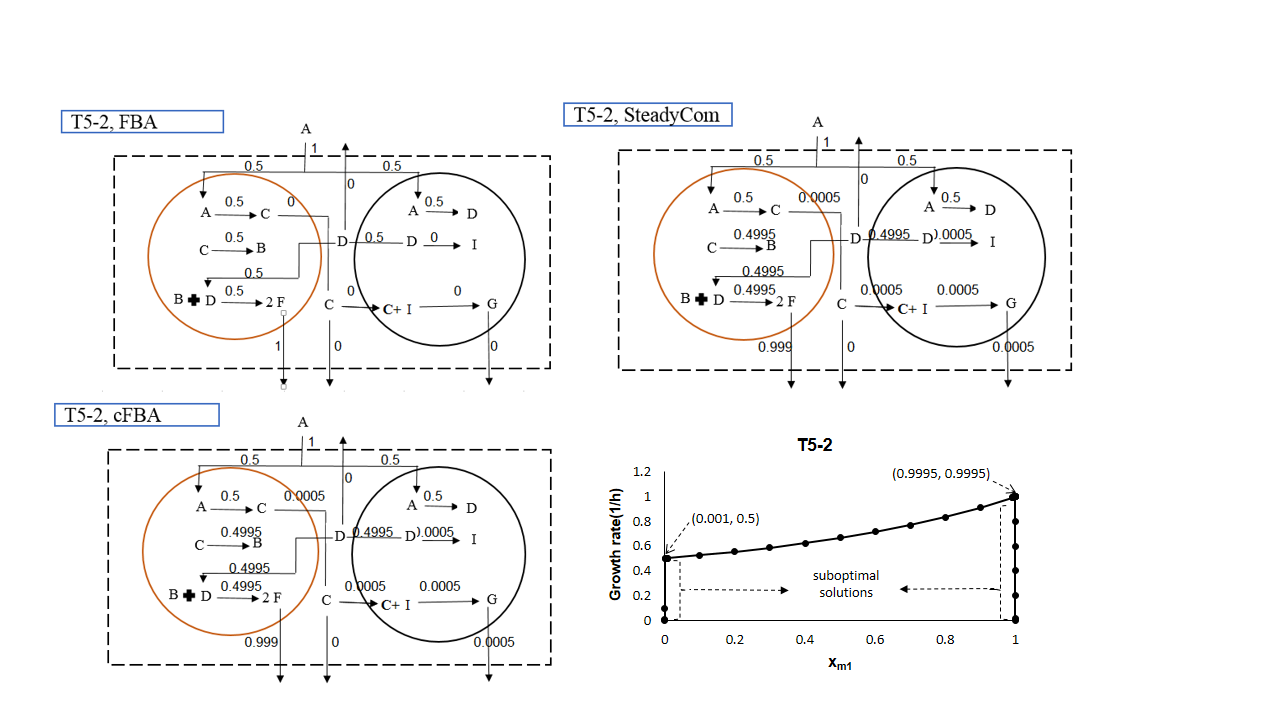


**Fig. S19** Flux distributions obtained by the three algorithms and cFBA plot for run T5-2


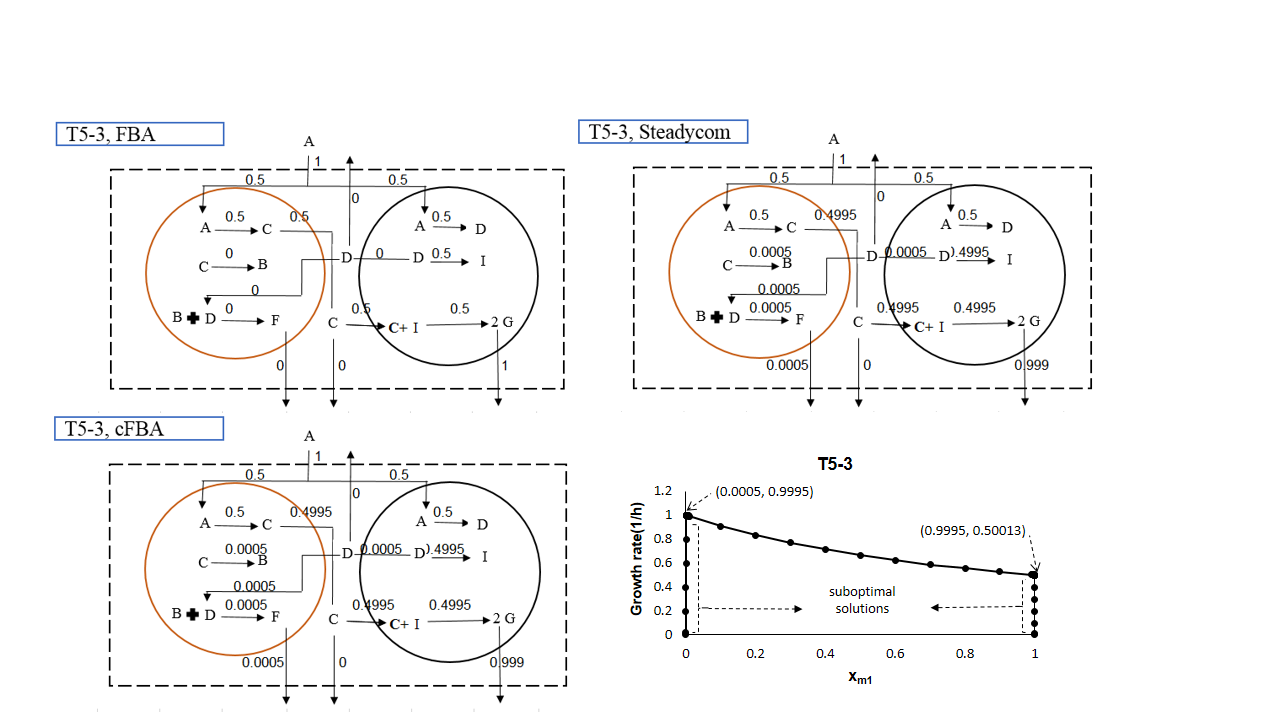


**Fig. S20** Flux distributions obtained by the three algorithms and cFBA plot for run T5-3
