# Supplementary material for: Effect of Microbial Interactions on Performance of Community Metabolic Modeling Algorithms: Flux Balance analysis (FBA), Community FBA (cFBA) and SteadyCom
Source: Research Square preprint supplement (doi:10.21203/rs.3.rs-4226944/v1), 2024-04-12
Supplement: Supplementary file 3 [file 97efd3f2f7c5084b5913ce69.xlsx]

## Sheet: Sheet1
Article title: Effect of Microbial Interactions on Performance of Community Metabolic Modeling Algorithms: Flux Balance analysis (FBA), Community FBA (cFBA) and SteadyCom
Bioprocess and Biosystems Engineering
Maryam Afarin; Fereshteh naeimpoor*
Biotechnology Research Laboratory, School of Chemical, Petroleum and Gas Engineering, Iran University of Science and Technology, Tehran, Iran
*Corresponding author; Email address: fnaeim@iust.ac.ir

## Sheet: m1, T1
Abbreviation	Description	Reaction	Lower bound	Upper bound	Objective
EX_1	EX_1	A[e] =>	-1	0	0
EX_2	EX_2	C[e] =>	0	1000	0
EX_3	EX_3	J[e] =>	-1000	0	0
_4	_3	A[e] -> B[c] + C[e]	0	1000	0
_5	_5	B[c] + J[e] -> F[c]	0	1000	0
BiomassSynthesis	_6	F[c] ->	0	1000	1

## Sheet: m2, T1
Abbreviation	Description	Reaction	Lower bound	Upper bound	Objective
EX_1	EX_1	E[e] =>	-1	0	0
EX_2	EX_2	C[e] =>	-1000	0	0
_3	_3	C[e] + E[e] -> G[c]	0	1000	0
BiomassSynthesis	_4	G[c] ->	0	1000	1

## Sheet: m1, T2
Abbreviation	Description	Reaction	Lower bound	Upper bound	Objective
EX_1	EX_1	A[e] =>	-1	0	0
EX_2	EX_2	J[e] =>	-1000	0	0
_3	_3	A[e] -> B[c]	0	1000	0
_4	_4	B[c] + J[e] -> F[c]	0	1000	0
BiomassSynthesis	_5	F[c] ->	0	1000	1

## Sheet: m2, T2
Abbreviation	Description	Reaction	Lower bound	Upper bound	Objective
EX_1	EX_1	A[e] =>	-1	0	0
EX_2	EX_2	H[e] =>	-1000	0	0
_3	_3	A[e] -> C[c]	0	1000	0
_4	_4	C[c] + H[e] -> G[c]	0	1000	0
BiomassSynthesis	_6	G[c] ->	0	1000	1

## Sheet: m1, T3
Abbreviation	Description	Reaction	Lower bound	Upper bound	Objective
_1	_1	A[e] -> C[e]	0	1000	0
_2	_2	C[e] -> B[c]	0	1000	0
_3	_3	D[e] + B[c] -> F[c]	0	1000	0
BiomassSynthesis	_4	F[c] ->	0	1000	1
EX_1	EX_1	A[e] <=>	-1	1000	0
EX_2	EX_2	C[e] <=>	0	1000	0
EX_3	EX_3	D[e] <=>	-1000	1000	0

## Sheet: m2, T3
Abbreviation	Description	Reaction	Lower bound	Upper bound	Objective
EX_1	EX_1	E[e] =>	-1	0	0
EX_3	EX_3	D[e] =>	0	1000	0
EX_4	EX_4	C[e] =>	-1000	1000	0
_3	_3	E[e] -> D[e]	0	1000	0
_4	_4	D[e] -> I[c]	0	1000	0
_6	_6	C[e] + I[c] -> G[c]	0	1000	0
BiomassSynthesis	_7	G[c] ->	0	1000	1

## Sheet: m1, T4
Abbreviation	Description	Reaction	Lower bound	Upper bound	Objective
EX_1	EX_1	A[e] =>	-1	0	0
EX_2	EX_2	C[e] =>	0	1000	0
EX_3	EX_3	J[e] =>	-1000	0	0
_4	_3	A[e] -> B[c] + C[e]	0	1000	0
_5	_5	B[c] + J[e] -> F[c]	0	1000	0
BiomassSynthesis	_6	F[c] ->	0	1000	1

## Sheet: m2, T4
Abbreviation	Description	Reaction	Lower bound	Upper bound	Objective
EX_1	EX_1	A[e] =>	-1	0	0
EX_2	EX_2	C[e] =>	-1000	0	0
_3	_3	C[e] + A[e] -> G[c]	0	1000	0
BiomassSynthesis	_4	G[c] ->	0	1000	1

## Sheet: m1,T5
Abbreviation	Description	Reaction	Lower bound	Upper bound	Objective
_1	_1	A[e] -> C[e]	0	1000	0
_2	_2	C[e] -> B[c]	0	1000	0
_3	_3	D[e] + B[c] -> F[c]	0	1000	0
BiomassSynthesis	_4	F[c] ->	0	1000	1
EX_1	EX_1	A[e] <=>	-1	1000	0
EX_2	EX_2	C[e] <=>	0	1000	0
EX_3	EX_3	D[e] <=>	-1000	1000	0

[truncated: 1 more sheets: m2, T5]
